# Supplementary material for: Clinical, Laboratory, and Molecular Epidemiology of an Outbreak of Aseptic Meningitis Due to a Triple-Recombinant Echovirus in Ashburton, New Zealand
Source: MDPI journal article supplement (doi:10.3390/v14040658), 2022-03-22
Supplement: s1 [file s1]

Supplementary materials

# Clinical, Laboratory, and Molecular Epidemiology of an Outbreak of Aseptic Meningitis Due to a Triple-Recombinant Echovirus in Ashburton, New Zealand

**Table S1.** Laboratory findings on patients tested.

| Sample    | WCC<br>( $\times 10^6/L$ ) | CSF protein<br>(g/L) | CSF glucose<br>(mmol/L) | Peripheral WBC<br>( $\times 10^9/L$ ) | CRP<br>(mg/L) |
|-----------|----------------------------|----------------------|-------------------------|---------------------------------------|---------------|
| 17AK4371O | 243                        | 0.32                 | 3.2                     | 4.6                                   | 4             |
| 17AI4233A | 101                        | 0.76                 | 3.4                     | 12.2                                  | 14            |
| 17AE7121N | 83                         | 0.50                 | 3.2                     | 4.4                                   | 11            |
| 17AE6281G | 560                        | 1.24                 | 3.1                     | 9.7                                   | 9             |
| 17Z79859A | 216                        | 0.76                 | 3.3                     | 5.0                                   | 8             |
| 17Z78549V | 160                        | 0.72                 | 3.9                     | 10.3                                  | 63            |
| 17WQ2027G | 111                        | 0.99                 | 3.3                     | 7.9                                   | 31            |
| 17WQ0610M | 228                        | 0.77                 | 3.2                     | 7.8                                   | 41            |
| 17Z74186F | 905                        | 0.88                 | 3.8                     | 13.0                                  | 10            |

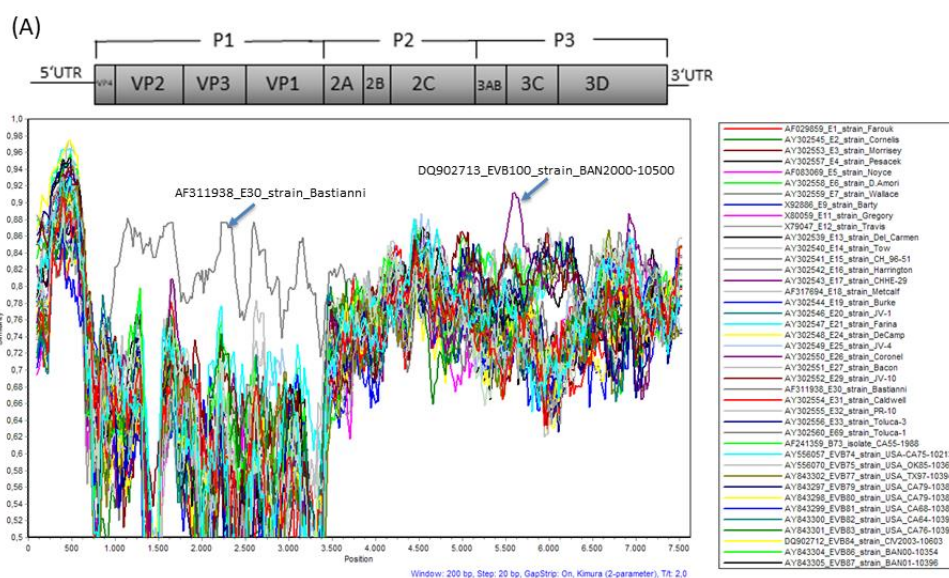

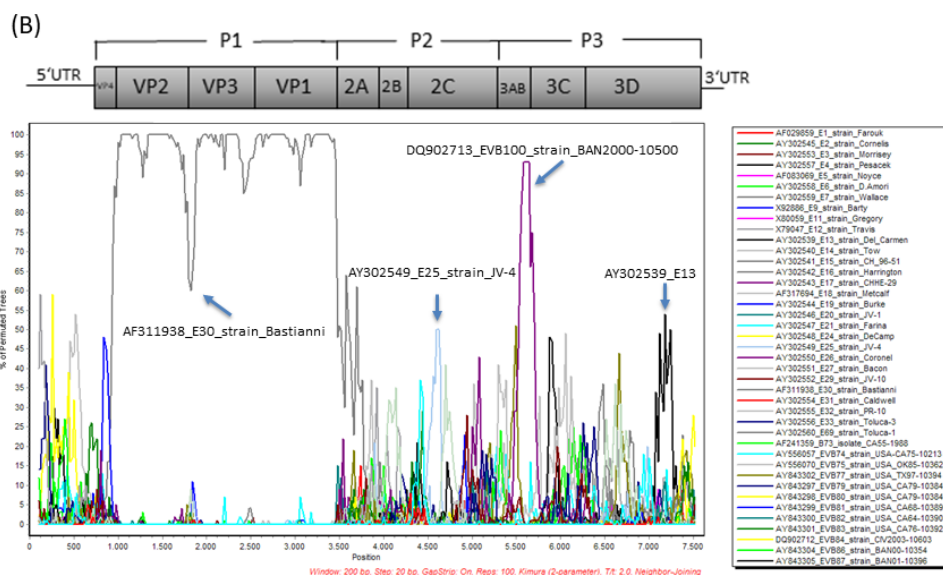

**Figure S1.** Whole genome Simplot BootScan analysis with the query sequence of strain NZ/Ashburton/17WQ2027G/2017-08-20 (accession number MW586892) compared to Enterovirus prototype strains mentioned in [12]. **A:** Similarity plot analysis, **B:** Bootscanning analysis on the putative recombinant strain and enterovirus prototype strains. The enterovirus genomic organization is shown in the top.

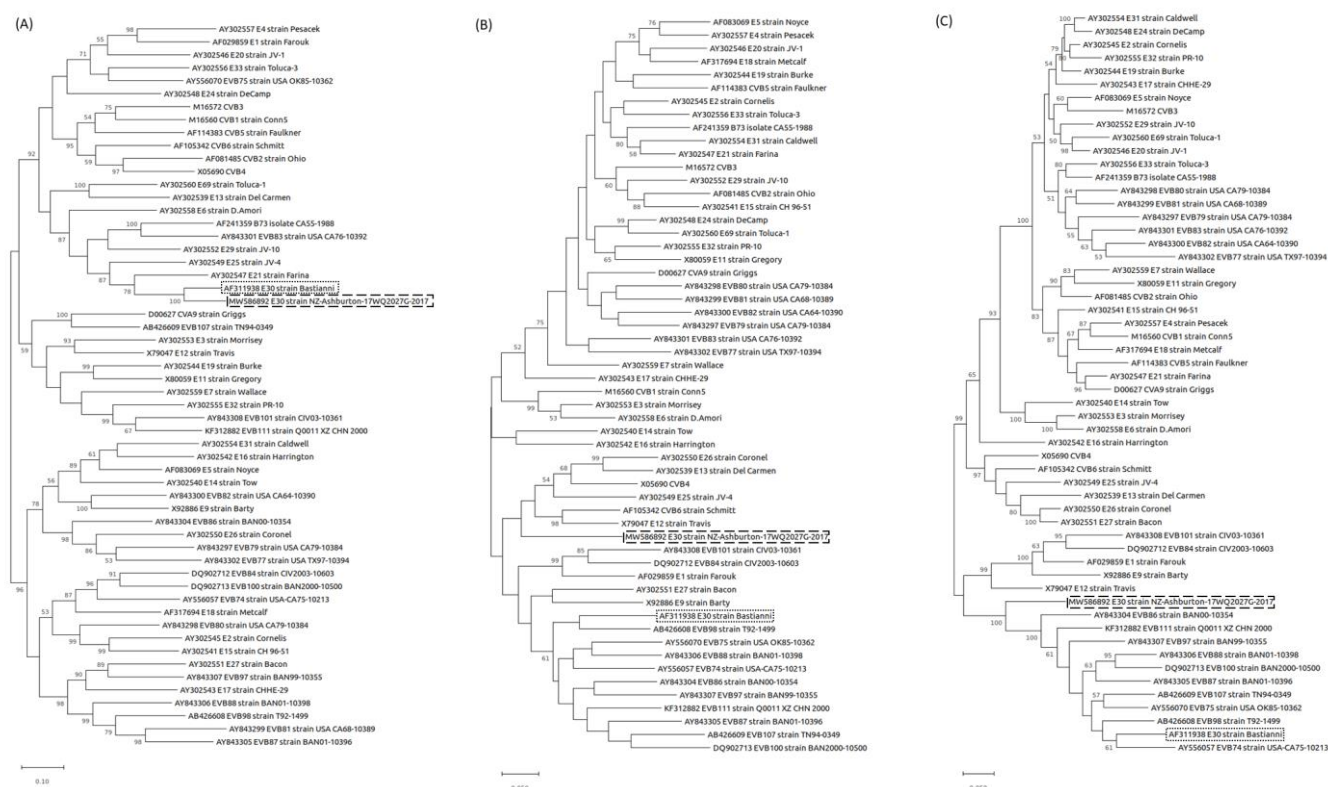

**Figure S2.** Maximum-likelihood phylogenetic analysis based on the P1 (A), P2 (B) and P3 (C) coding sequences of the recombinant NZ-Ashburton E30 enterovirus (MW58689, dashed box) and enterovirus prototype strains described in [12] including E30 prototype strain Bastianni (AF311938, dotted box).
